# Supplementary material for: Adaptive immune cells are necessary for SARS-CoV-2–induced pathology
Source: PubMed Central journal article supplement — Sci Adv. 2024 Jan 3;10(1):eadg5461. doi: 10.1126/sciadv.adg5461 (PMC10775995; doi:10.1126/sciadv.adg5461), 2024-01-03
Supplement: sciadv.adg5461_sm.pdf [file sciadv.adg5461_sm.pdf]

Supplementary Materials for  
**Adaptive immune cells are necessary for SARS-CoV-2–induced pathology**

Brian Imbiakha *et al.*

Corresponding author: Avery August, [averyaugust@cornell.edu](mailto:averyaugust@cornell.edu); Hector C. Aguilar, [ha363@cornell.edu](mailto:ha363@cornell.edu)

*Sci. Adv.* **10**, eadg5461 (2024)  
DOI: 10.1126/sciadv.adg5461

**This PDF file includes:**

Figs. S1 to S4

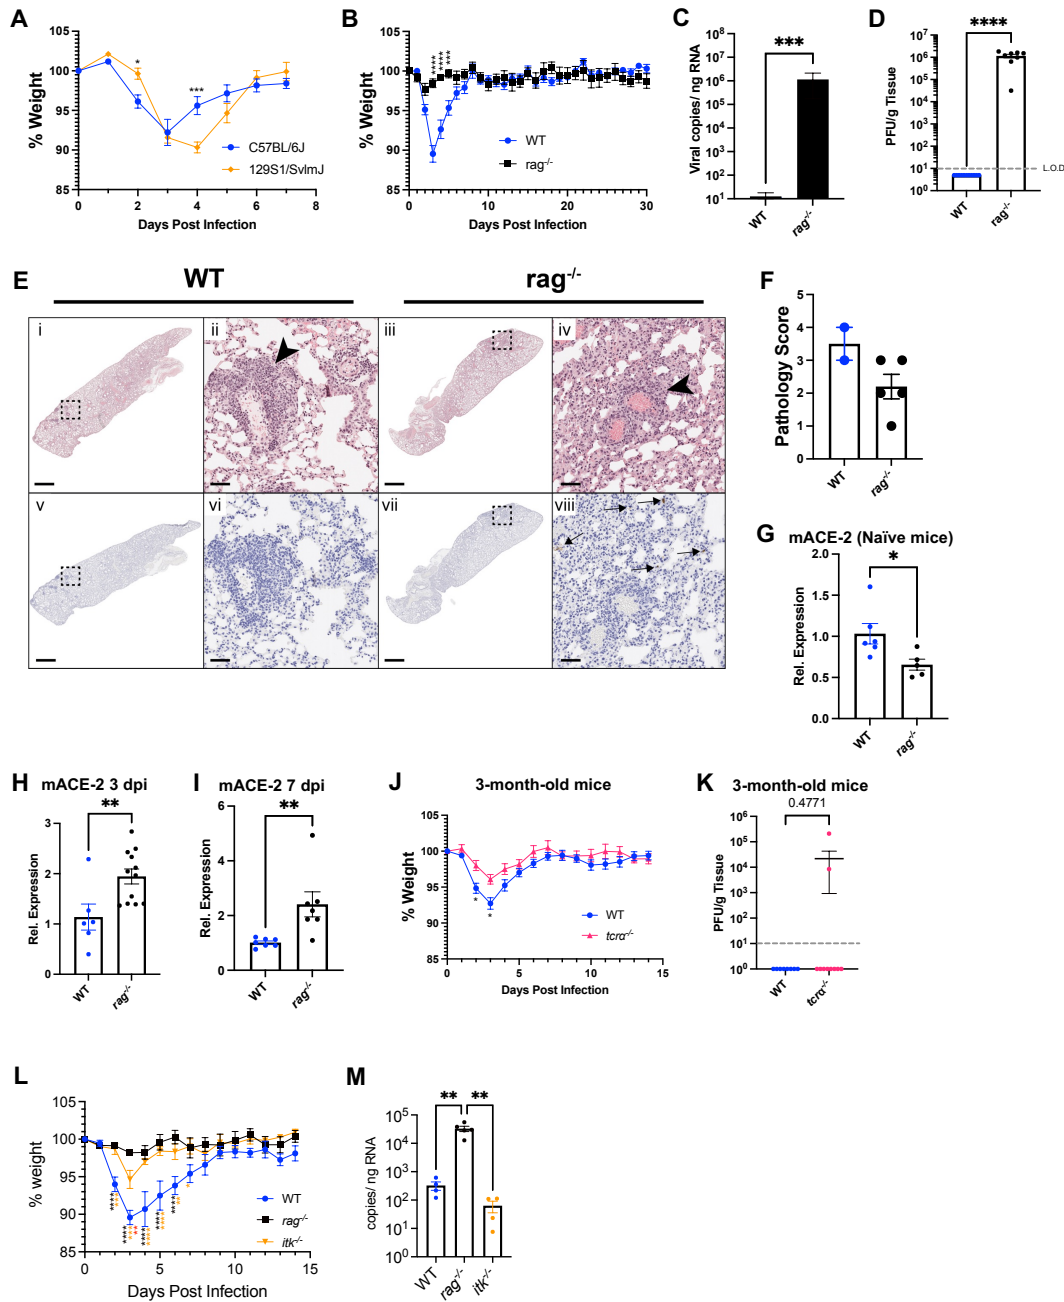

**Fig. S1. Virus infection persists in *rag*<sup>-/-</sup> mice up to 30 days post infection.** **A.** C57BL/6J (n=6) and 129S1/SvImJ (n=7) mice were infected with 1X10<sup>5</sup> PFU/mouse and weights were monitored daily. Percent weight following infection. \*p= 0.0428, \*\*\*p=0.0004, 2-way ANOVA with Sidak's multiple comparison test, experiments performed once. **B.** Percent weight loss in wild-type and *rag*<sup>-/-</sup> mice following infection. WT: n=11, *rag*<sup>-/-</sup>: n=8, \*\*\*\*p< 0.0001, \*\*\*p=0.0005, 2-way ANOVA with Sidak's multiple comparison test. experiments performed twice. **C.** Viral loads in the lung of wild-type and *rag*<sup>-/-</sup> mice 30 days post infection. WT: n=11, *rag*<sup>-/-</sup>: n=8, \*\*\*p=0.001,

2-tailed Mann-Whitney test, experiments performed twice, and 2 technical replicates were performed for each animal. **D.** Infectious virus in the lungs of wild-type and *rag*<sup>-/-</sup> mice 30 days post infection. WT: n=11, *rag*<sup>-/-</sup>: n=8, \*\*\*p<0.0001, 2-tailed Mann-Whitney test, experiments performed twice, and 2 technical replicates were performed for each animal. **E.** H&E staining of wild-type and *rag*<sup>-/-</sup> mice lung (top row) and immunohistochemistry staining (brown stain, bottom row) against the SARS-CoV-2 MA10 nucleoprotein at day 30 post infection. WT: n=2, *rag*<sup>-/-</sup>: n=5, experiments performed once. **F.** Histopathology scoring of wild-type and *rag*<sup>-/-</sup> mice at day 30 post infection. WT: n=2, *rag*<sup>-/-</sup>: n=5, experiments performed once. **G.** mouse-ACE-2 mRNA expression from the lungs of non-infected mice (Naïve mice). WT: n=6, *rag*<sup>-/-</sup>: n=5, \*p<0.05, 2-tailed Mann-Whitney test. **H.** mouse-ACE-2 mRNA expression from the lungs of SARS-CoV-2 MA10 infected mice 3 d.p.i. WT: n=6, *rag*<sup>-/-</sup>: n=12, \*\*p<0.01, 2-tailed Mann-Whitney test. **I.** mouse-ACE-2 mRNA expression from the lungs of infected mice 7 d.p.i. WT: n=7, *rag*<sup>-/-</sup>: n=7, \*\*p<0.01, 2-tailed Mann-Whitney test. **J&K.** 3-month-old wild-type and *trc*<sup>-/-</sup> mice were infected with 10<sup>5</sup> PFU/mouse SARS-CoV-2 MA10 and weights were monitored daily. **J.** Percent weight following infection. WT: n=8, *trc*<sup>-/-</sup>: n=10, \* p< 0.05, 2-way ANOVA with Sidak's multiple comparison test. **K.** Infectious virus in the lungs of WT and *trc*<sup>-/-</sup> 14 d.p.i. WT: n=8, *trc*<sup>-/-</sup>: n=10. **L&M.** 6-month-old wild-type and *rag*<sup>-/-</sup> and *itk*<sup>-/-</sup> mice were infected with 10<sup>5</sup> PFU/mouse SARS-CoV-2 MA10 and weights were monitored daily. **L.** Percent weight following infection. WT: n=8, *rag*<sup>-/-</sup>: n=10, *itk*<sup>-/-</sup>: n=4, \* p< 0.05, \*\* p< 0.01, \*\*\* p< 0.001, \*\*\*\*p < 0.0001, 2-way ANOVA with Tukey's multiple comparisons test. **M.** viral RNA in the lungs of wild-type, *rag*<sup>-/-</sup> and *itk*<sup>-/-</sup> mice at 14 d.p.i. WT: n=4, *rag*<sup>-/-</sup>: n=5, *itk*<sup>-/-</sup>: n=4, \*\* p<0.01, 1-way ANOVA with Tukey's multiple comparisons test.

### Gating Strategy T cells

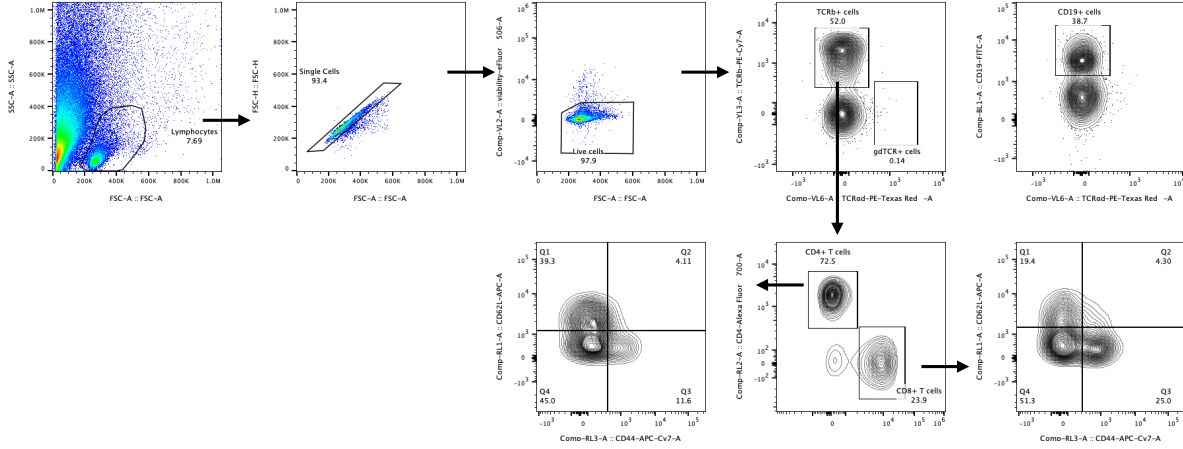

### Gating Strategy Granulocytes

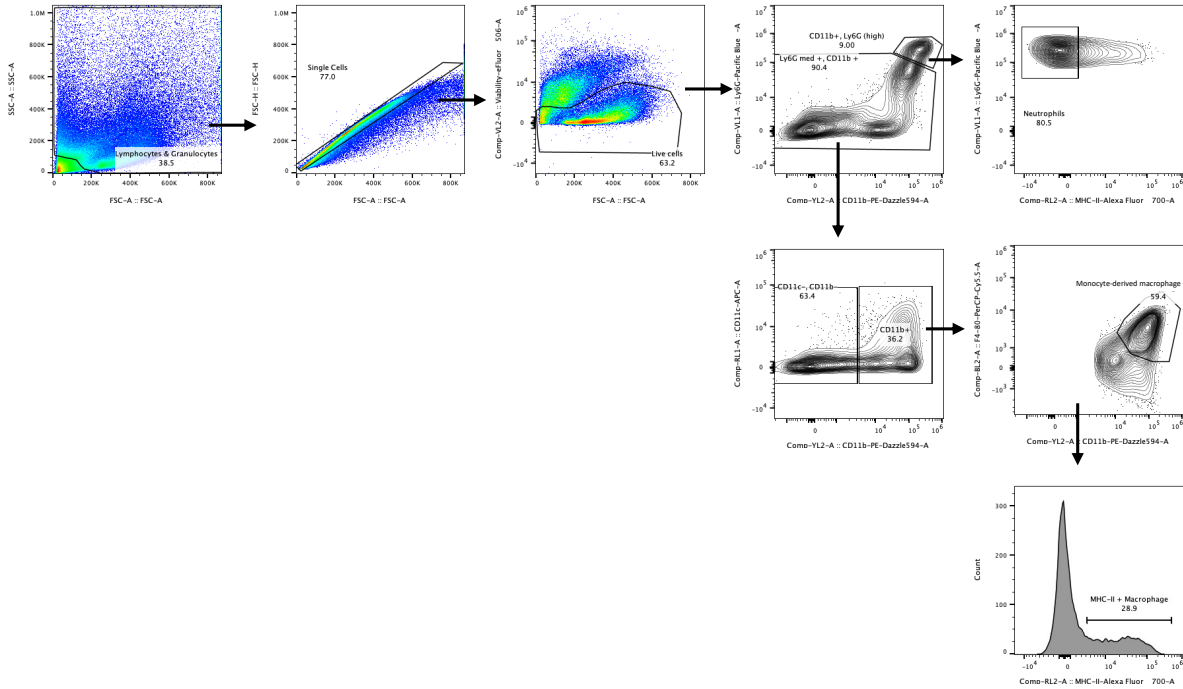

Fig. S2. Gating strategy to identify indicated cell populations in the lungs of mice.

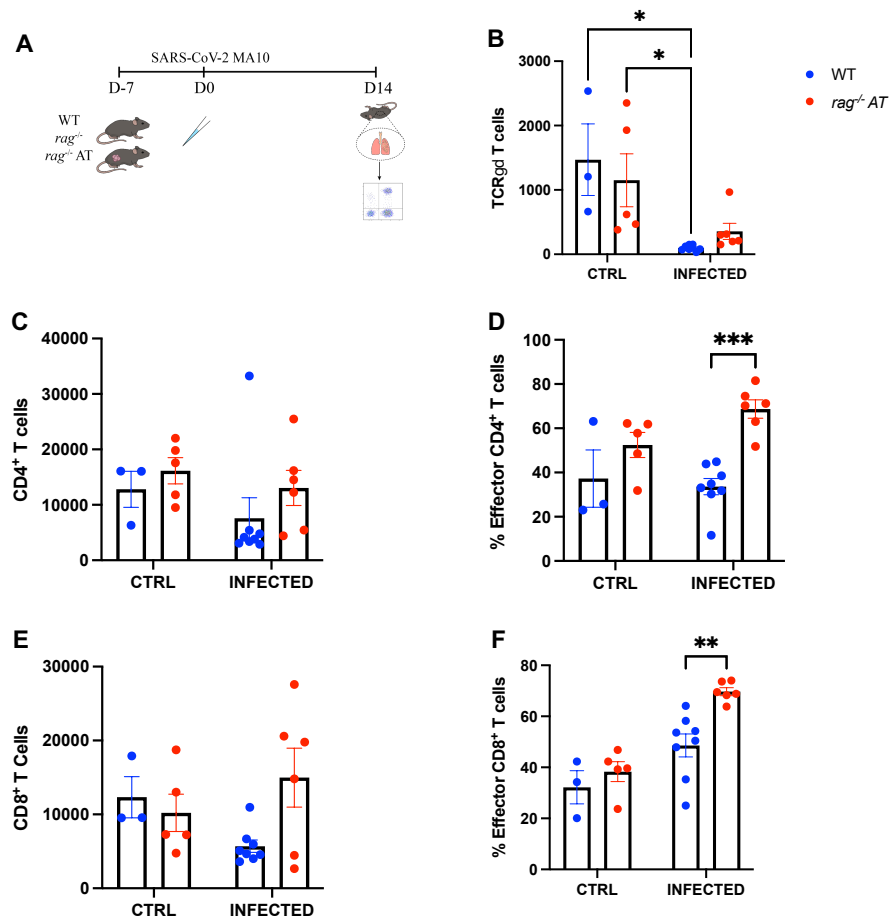

**Fig. S3. *rag*<sup>-/-</sup> AT mice have elevated effector T cells in the lung compared to wild-type mice.** **A.** On day 14 post infection (or mock infection, CTRL), lungs were collected from wild-type and *rag*<sup>-/-</sup> AT mice and cells were analyzed using flow cytometry. **B.** Number of  $\gamma\delta$  T cells. **C.** Pulmonary CD4<sup>+</sup> T (TCR $\beta$ <sup>+</sup>, CD4<sup>+</sup>) cells at day 14 post infection. **D.** Percent Effector CD4<sup>+</sup> T (TCR $\beta$ <sup>+</sup>, CD4<sup>+</sup>, CD62L<sup>-</sup>, CD44<sup>+</sup>) cells in the lungs at day 14 post infection. **E.** Number of CD8<sup>+</sup> T (TCR $\beta$ <sup>+</sup>, CD8<sup>+</sup>) cells in the lungs at day 14 post infection. **F.** Percent of Effector CD8<sup>+</sup> T (TCR $\beta$ <sup>+</sup>, CD8<sup>+</sup>, CD62L<sup>-</sup>, CD44<sup>+</sup>) cells in the lungs of wild-type and *rag*<sup>-/-</sup> mice at day 14 post infection. WT: control, n=3, infected, n=8, *rag*<sup>-/-</sup>: control, n=5, infected, n=6, \*p<0.05,\*\*p<0.01, \*\*\*p<0.001, 2-way ANOVA with Tukey's multiple comparison test, experiments performed once.

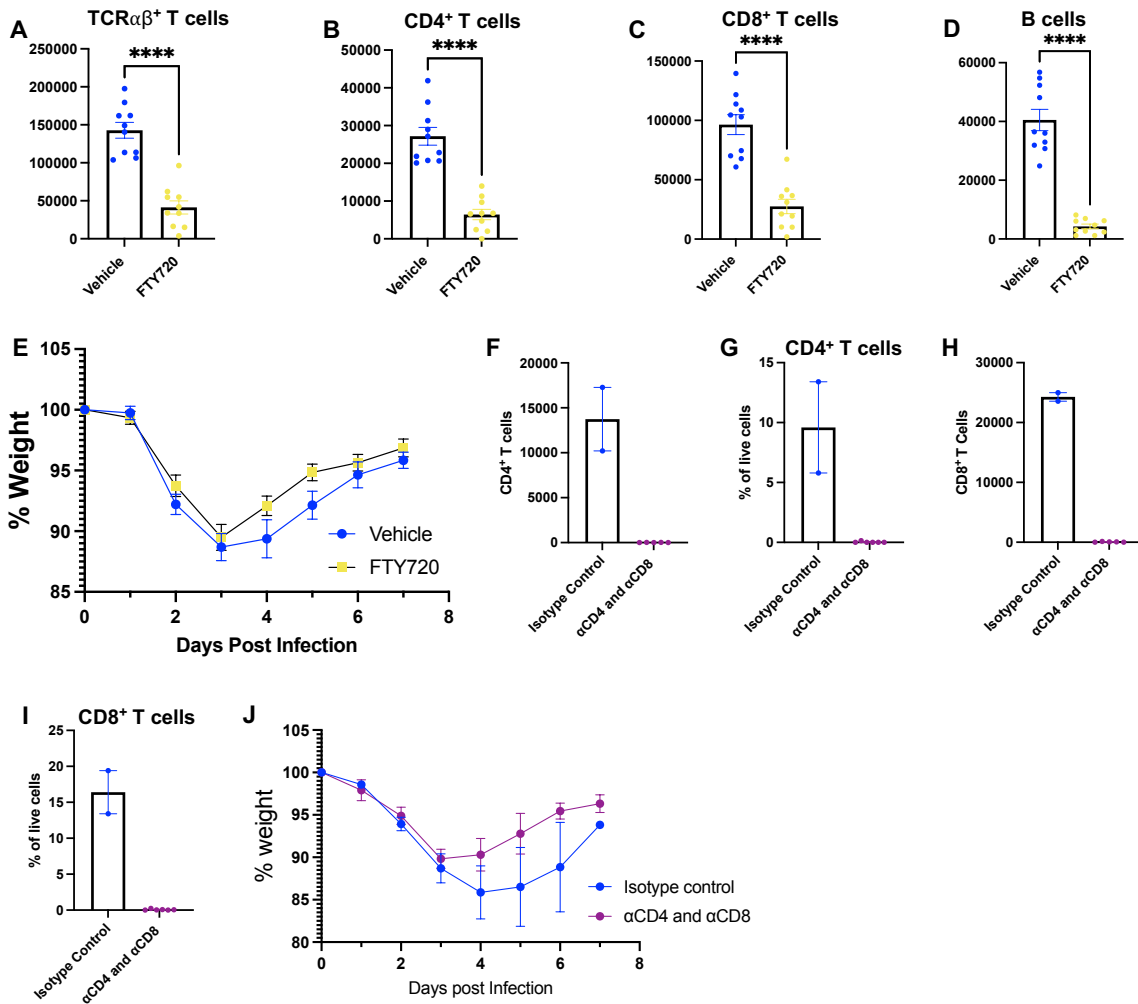

**Fig. S4. Tissue resident immune cell likely drive the morbidity observed in WT mice following SARS-CoV-2 MA10 infection.** WT mice treated with 1mg/kg FTY720 or vehicle (2% hydroxypropyl-beta-cyclodextrin) starting -2dpi and infected with  $1 \times 10^5$  PFU/mouse on day 0. Flow cytometry analysis was performed to measure immune cells in the lungs of FTY720 and vehicle treated mice (**A-D**). **A.** TCR $\beta^+$  T cells. **B.** CD4 $^+$  T cells. **C.** CD8 $^+$  T cells. **D.** CD19 $^+$ , B220 $^+$  cells. Vehicle: n=10, FTY720: n=10, \*\*\*\*p<0.0001, 2-tailed Mann-Whitney test, experiments performed once. **E.** Percent weight change. Vehicle: n=10, FTY720: n=10, 2-way ANOVA with Sidak's multiple comparison test, experiments performed once. WT mice were treated with either a combination of  $\alpha$ -CD4 and  $\alpha$ -CD8 depleting antibodies or isotype control every other starting -2 dpi followed by infection with  $10^5$  PFU/mouse SARS-CoV-2 MA10 on day 0. Lung T cells were analyzed by flow cytometry 7 dpi and weights monitored daily (**F-J**). **F.** CD4 $^+$  T cells. **G.** Frequency of CD4 $^+$  T cells as a percentage of live cells. **H.** CD8 $^+$  T cells. **I.** Frequency of CD8 $^+$  T cells as a percentage of live cells. **J.** Percent weight change.
